# Supplementary material for: Are degree of urbanisation and travel times to healthcare services associated with the processes of care and outcomes of heart failure? A retrospective cohort study based on administrative data
Source: PLOS journal article supplement (doi:10.1371/journal.pone.0223845), 2019-10-28
Supplement: S6 (10.1371/journal.pone.0223845.s006) [file journal.pone.0223845.s006]

**Table A. Comorbidities retrieved from hospital discharge records: 31 Elixhauser conditions plus acute myocardial infarction, cerebrovascular diseases, dementia, and leukaemia (Quan et al. 2005, for ICD-9-CM codes).**

| Clinical condition                              |
|-------------------------------------------------|
| History of congestive heart failure             |
| Cardiac arrhythmias                             |
| Valvular disease                                |
| Pulmonary circulation disorders                 |
| Peripheral vascular disorders                   |
| Hypertension, uncomplicated                     |
| Hypertension, complicated                       |
| Paralysis                                       |
| Other neurological disorders                    |
| Chronic pulmonary disease                       |
| Diabetes, uncomplicated                         |
| Diabetes, complicated                           |
| Hypothyroidism                                  |
| Chronic kidney disease                          |
| Liver disease                                   |
| Peptic ulcer disease excluding bleeding         |
| AIDS/HIV                                        |
| Lymphoma                                        |
| Metastatic cancer                               |
| Solid tumour without metastasis                 |
| Rheumatoid arthritis/collagen vascular diseases |
| Coagulopathy                                    |
| Obesity                                         |
| Weight loss                                     |
| Fluid and electrolyte disorders                 |
| Blood loss anaemia                              |
| Deficiency anaemia                              |
| Alcohol abuse                                   |
| Drug abuse                                      |
| Psychoses                                       |
| Depression                                      |
| Acute myocardial infarction                     |
| Cerebrovascular diseases                        |
| Dementia                                        |
| Leukaemia                                       |

**Table B. ATC codes for identification of medication use before heart failure.**

| Medication                                                             | ATC codes               |
|------------------------------------------------------------------------|-------------------------|
| Antidiabetic drugs                                                     | A10                     |
| Drugs for cardiac therapy                                              | C01                     |
| Drugs for obstructive airway diseases                                  | R03                     |
| Diuretics                                                              | C03                     |
| $\beta$ -blockers                                                      | C07                     |
| Angiotensin-converting enzyme inhibitors/angiotensin receptor blockers | C09                     |
| Calcium channel blockers and other antihypertensive drugs              | C02, C08                |
| Statins                                                                | C10AA                   |
| Antiplatelet drugs                                                     | B01AC                   |
| Oral anticoagulants                                                    | B01AA03, B01AA07, B01AE |
